# Supplementary material for: The deactivation mechanism of Pb on the Ce/TiO2 catalyst for the selective catalytic reduction of NOx with NH3: TPD and DRIFT studies
Source: Royal Society of Chemistry journal article supplement (doi:10.1039/c6cp07271b), 2017-01-01
Supplement: c6cp07271b1.pdf [file c6cp07271b1.pdf]

The deactivation mechanism of Pb on Ce/TiO<sub>2</sub> catalyst for selective catalytic reduction of NO<sub>x</sub>  
with NH<sub>3</sub>:  
TPD, DRIFT and kinetics studies

Shu-xian Wang<sup>a,b</sup>, Rui-tang Guo<sup>a,b\*</sup>, Wei-guo Pan<sup>a,b</sup>, Ming-yuan Li<sup>a,b</sup>, Peng Sun<sup>a,b</sup>,

Shu-ming Liu<sup>a,b</sup>, Shuai-wei Liu<sup>a,b</sup>, Xiao Sun<sup>a,b</sup>, Jian Liu<sup>a,b</sup>

a. School of Energy Source and Mechanical Engineering, Shanghai University of Electric Power,

Shanghai, P. R. China

b. Shanghai Engineering Research Center of Power Generation Environment Protection, Shanghai,

P. R. China

**Corresponding author:**

**Rui-tang Guo**

**E-mail:** grta@zju.edu.cn

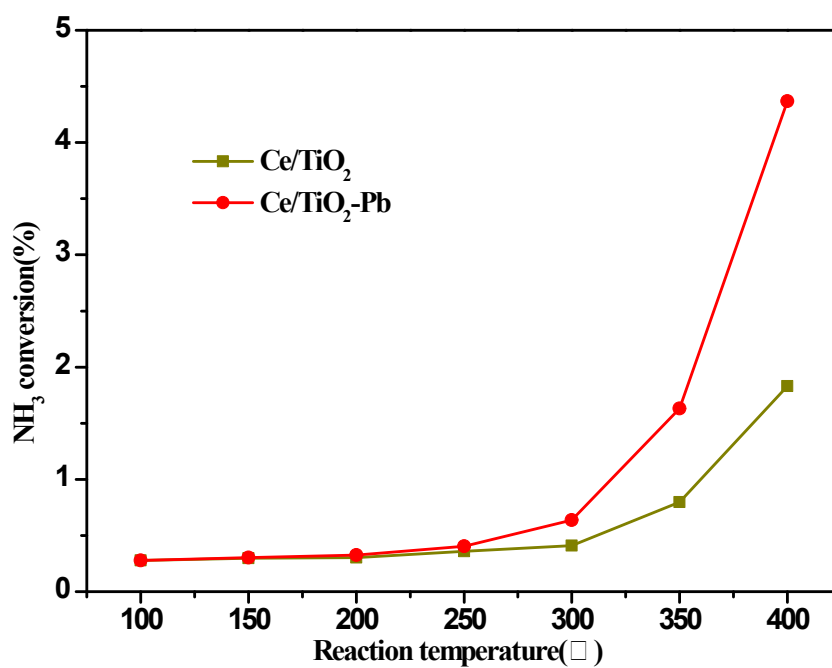

Fig.S1 NH<sub>3</sub> oxidation activities of the two catalyst samples as a function of reaction temperature

Reaction conditions: [NH<sub>3</sub>] = 600 ppm, [O<sub>2</sub>] = 5%, balance Ar, total flow rate = 1L/min,  
GHSV=108,000h<sup>-1</sup>

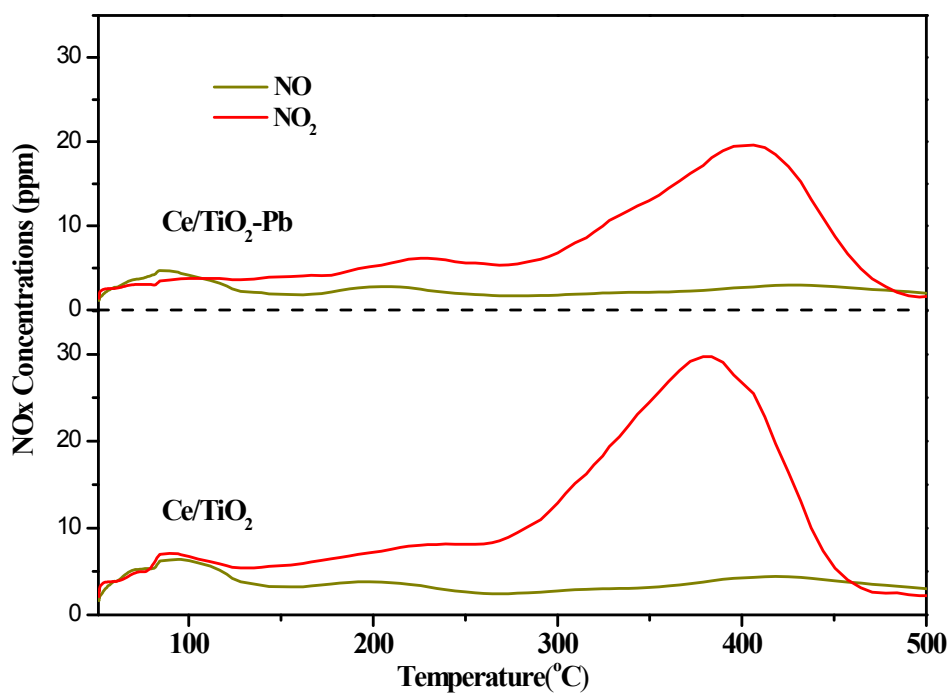

Fig.S2 NO+O<sub>2</sub>-TPD profiles of the two catalyst samples

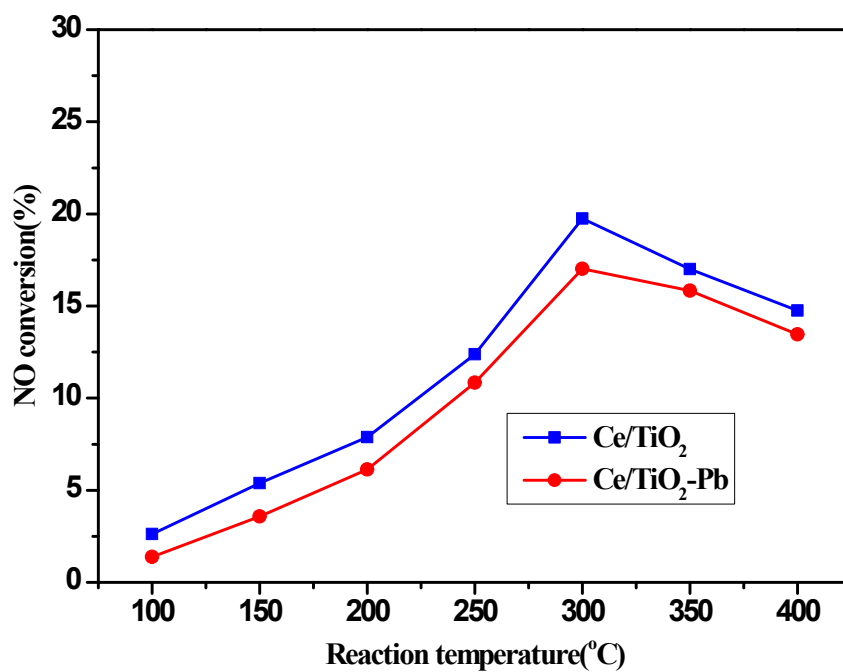

Fig.S3 NO oxidation over the two catalyst samples as a function of reaction temperature  
Reaction conditions: [NO] = 600 ppm, [O<sub>2</sub>] = 5%, balance Ar, total flow rate = 1L/min

The specific surface areas of the two catalyst samples were measured by N<sub>2</sub> adsorption and desorption at liquid nitrogen temperature (-196°C) on a Quantachrome Autosorb-iQ-AG instrument, followed by calculation based on the Brunauer–Emmett–Teller (BET) method. The results of BET surface areas of the two catalyst samples are summarized in Table S1.

Table S1. BET surface areas of the two catalyst samples

| Samples                 | BET surface area<br>(m <sup>2</sup> /g) |
|-------------------------|-----------------------------------------|
| Ce/TiO <sub>2</sub>     | 110.01                                  |
| Ce/TiO <sub>2</sub> -Pb | 88.49                                   |
